# Supplementary material for: Molecular insights into HSD10 disease: impact of SDR5C1 mutations on the human mitochondrial RNase P complex
Source: PubMed Central journal article supplement — Nucleic Acids Res. 2015 Apr 29;43(10):5112–9. doi: 10.1093/nar/gkv408 (PMC4446446; doi:10.1093/nar/gkv408), 2015-04-29
Supplement: supp_gkv408_Vilardo_revised_Supplementary_Data_r3.pdf [file supp_gkv408_Vilardo_revised_Supplementary_Data_r3.pdf]

## **SUPPLEMENTARY DATA**

### **Molecular insights into HSD10 disease: impact of SDR5C1 mutations on the human mitochondrial RNase P complex**

**Elisa Vilardo and Walter Rossmannith\***

Center for Anatomy & Cell Biology, Medical University of Vienna, 1090 Vienna, Austria

\*To whom correspondence should be addressed.

Tel: +43 1 40160 37512; Email: [walter.rossmanith@meduniwien.ac.at](mailto:walter.rossmanith@meduniwien.ac.at)

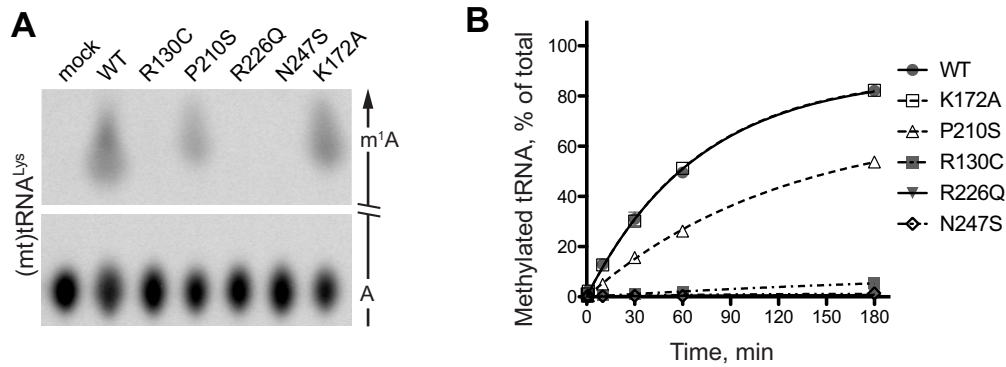

**Supplementary Figure S1.** Mutations in SDR5C1 affect the tRNA-methyltransferase activity of the TRMT10C-SDR5C1 complex. **(A and B)** The methyltransferase subcomplex of mtRNase P was reconstituted from recombinant TRMT10C and wild type or mutant SDR5C1, and its activity assayed with position-9 labelled (mt)tRNA<sup>Lys</sup> and SAM. Reaction aliquots were withdrawn and stopped at different time points and the tRNA hydrolysate resolved by TLC. In **(A)**, the 30-minutes time point of a representative experiment is shown. The direction of migration and the positions of A and m<sup>1</sup>A are indicated to the right; only the informative part of the TLC is shown. **(B)** Methylation data of two complete, independent experiments were plotted as means and SD, and fit by non-linear regression.

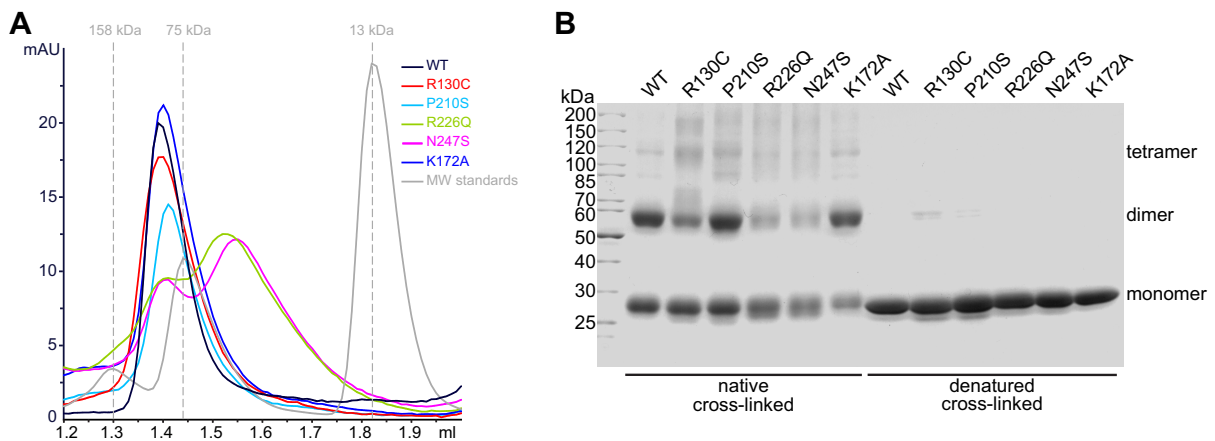

**Supplementary Figure S2.** Mutations in SDR5C1 affect its tetramerization. **(A)** Wild type and mutant, recombinant SDR5C1 were separated by size exclusion chromatography and the 280 nm-absorbance chromatograms overlaid. The elution profile of molecular weight standards is overlaid as a solid grey line, and the elution peaks are highlighted by vertical dashed lines: aldolase, 158 kDa; conalbumine, 75 kDa; cytochrome c, 13 kDa. Only the informative part of the chromatograms is shown. **(B)** Wild type and mutant SDR5C1 were subjected to rapid photochemical cross-linking, resolved by 6–18% gradient SDS-PAGE and stained by Coomassie brilliant blue. The molecular weight of marker proteins is indicated to the left. Cross-linked protein samples were loaded on the left part of the gel; control reactions (proteins SDS-denatured prior to cross-linking) were loaded on the right. The main bands and their interpretation with respect to oligomeric-state are specified to the right. The faint bands visible in the SDS-denatured samples R130C and P210S are minor contaminants in the protein preparation.
